# Supplementary material for: Acyl-Coa Thioesterases: A Rheostat That Controls Activated Fatty Acids Modulates Dengue Virus Serotype 2 Replication
Source: MDPI journal article supplement (doi:10.3390/v14020240), 2022-01-25
Supplement: s1 [file s1]

**Table S1.** siRNA and oligonucleotide resources used in this study.

| <b>siRNA resources</b>         |                             |                          |
|--------------------------------|-----------------------------|--------------------------|
| Reagent                        | Source                      | Product Identifier       |
| SMARTPool ACOT1 siRNA          | Horizon Discovery/Dharmacon | M-034967-00              |
| MISSION® esiRNA human<br>ACOT2 | Sigma-Aldrich               | EHU104751-20UG           |
| MISSION® esiRNA human<br>ACOT7 | Sigma-Aldrich               | EHU112971-20UG           |
| <b>Oligonucleotides</b>        |                             |                          |
|                                | Forward Primer (5'-3')      | Reverse Primer (5'-3')   |
| ACOT1/2                        | AGAGGAAGAGTTGGGCAGAG        | TTCGTCCCAGCAGCAGCG       |
| ACOT2                          | GCCCGAGAGGATGTCTAACA        | TCAGGCTCCATTGGTACAGC     |
| ACOT4                          | AGGAG GGTACAAGAACCCCA       | GAGGCTCGATGTAATGCCCA     |
| ACOT6                          | AGCCGTGGACTTTATGCTGC        | AGTACAGTGGCTGTGATGCC     |
| ACOT7                          | CTGCACCCTGCACGGCTTTG        | CGGAAGCTGTGACGATGTTG     |
| ACOT8                          | GCTCTCGCATT CATAGAGCAT      | AAGTTCAGTGGCCATGTTAGC    |
| ACOT9                          | AAGTTCAGTGGCCATGTTAGC       | AATGCCGGCCCTTTATTTTCA    |
| ACOT11                         | AATCACCAGGGCAACACCTT        | CAATGGCCTTCAGCGTAGGG     |
| ACOT12                         | ACGCTATCGGGGAGCTATTG        | TTGCTGTCACTCAGGGATGC     |
| ACOT13                         | CTCTTCGCCCTTTGTGTCCT        | GAGTAATCTTTCCCAAACTCTCTC |

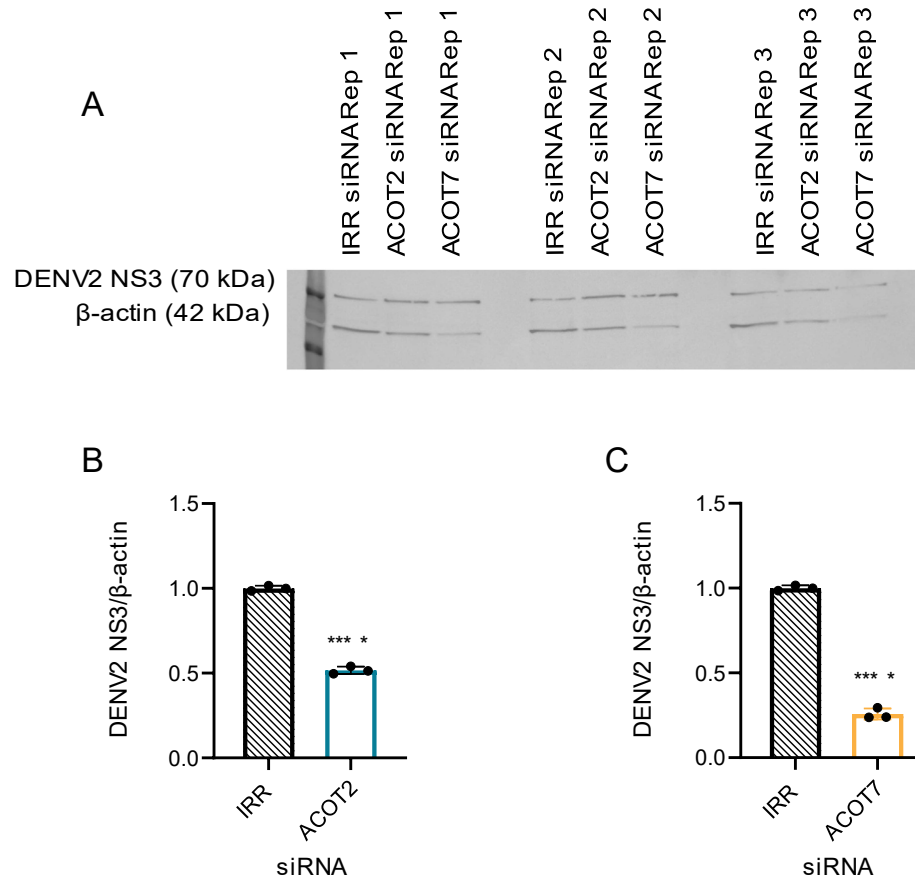

**Figure S1 – Loss of function of mitochondrial ACOTs inhibits viral protein translation.** Huh7 cells were transfected with either ACOT2, ACOT7, or an IRR siRNA, and then subsequently infected with DENV2 (MOI = 0.3) for 24hr. (A) Cell lysates were prepared and analyzed via western blot. Samples were probed for DENV2 nonstructural protein 3, and β-actin (for normalization). Li-cor IRDyes were used as secondary antibodies. (B-C) and fluorescence intensity of each band was analyzed using area under the curve analysis in ImageJ.
